# Supplementary material
Source: Springer Nature journal article supplement (https://www.springermedizin.de/resource/supplementary/12888_2013_1604_MOESM5_ESM.pdf/9480954)

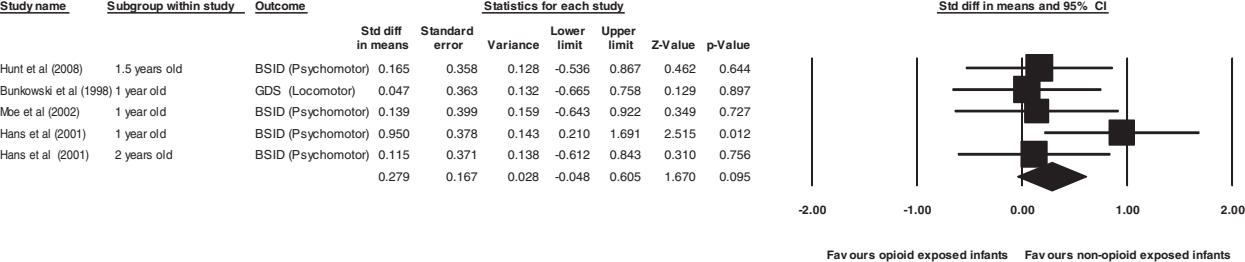

Supplement: MOESM5 [file 9480954]
